# Supplementary material
Source: publisher figshare collection journal article supplement (https://gsajournals.figshare.com/ndownloader/files/13553477)
Supplement: Supplementary file 1 [file 13553477]

gid	Structure	response_2014	response_2015
SWAG4_SW802_04	Lowland_East	82.22405635	73.77679215
SWAG4_SW790_04	Lowland_South	75.48214341	67.59140183
SWAG4_SW790_01	Lowland_South	72.1683218	54.07517853
SWAG4_SW796_04	Lowland_East	64.94985597	54.67772268
SWAG4_SW806_02	Lowland_East	69.54011846	49.14977513
SWAG4_SW805_02	Lowland_East	73.74176059	41.93668663
SWAG4_SW798_05	Lowland_East	67.02618482	46.51525703
SWAG4_SW798_10	Lowland_East	67.73767319	40.76520083
SWAG4_SW806_03	Lowland_East	60.87667588	41.91916689
SWAG4_SW788_09	Lowland_East	67.36899395	37.80989287
SWAG4_SW805_03	Lowland_East	58.91303536	45.48435864
SWAG4_SW793_10	Lowland_East	67.85935394	37.0199603
SWAG4_SW806_05	Lowland_East	54.11370751	48.80614233
SWAG4_ECS.1_06	Lowland_East	66.64642297	31.5743687
SWAG4_SW803_08	Lowland_East	57.75877104	43.24980363
SWAG4_ECS.1_07	Lowland_East	58.79876565	39.29896832
SWAG4_SW797_04	Lowland_East	57.77033826	40.10077817
SWAG4_SW806_04	Lowland_East	55.14213491	42.62075201
SWAG4_SW795_10	Lowland_East	61.99831755	35.4044633
SWAG4_SW806_06	Lowland_East	62.56966611	34.14447638
SWAG4_SW806_08	Lowland_East	56.0562926	39.98623391
SWAG4_SW805_05	Lowland_East	59.37011421	36.20627315
SWAG4_SW799_10	Lowland_East	59.33208366	36.60784535
SWAG4_SW805_06	Lowland_East	56.28483202	38.49715846
SWAG4_SW795_04	Lowland_East	56.62764115	38.0389814
SWAG4_SW798_09	Lowland_East	54.15377091	37.31422389
SWAG4_SW796_07	Lowland_East	55.48494404	37.46626007
SWAG4_Kanlow_06	Lowland_South	56.39910173	36.43536168
SWAG4_ECS.6_02	Lowland_East	51.8283133	39.64260111
SWAG4_SW802_01	Lowland_East	63.39202456	30.78768761
SWAG4_SW796_02	Lowland_East	49.6571888	40.90258803
SWAG4_SW798_06	Lowland_East	52.62820127	37.80989287
SWAG4_SW788_04	Lowland_East	56.10877939	33.81270608
SWAG4_SW803_02	Lowland_East	51.8283133	37.58080434
SWAG4_ECS.6_03	Lowland_East	60.85562044	28.18817459
SWAG4_SW788_08	Lowland_East	59.02730507	27.95908606
SWAG4_SW781_06	Lowland_East	50.11426764	34.94628624
SWAG4_SW802_06	Lowland_East	52.17112243	32.54085667
SWAG4_SW799_03	Lowland_East	43.71255631	39.88110628
SWAG4_SW803_09	Lowland_East	52.8567407	30.24997136
SWAG4_ECS.1_05	Lowland_East	53.01145133	29.66892804
SWAG4_SW795_02	Lowland_East	53.77089838	27.61545326
SWAG4_SW806_01	Lowland_East	50.45707677	30.47905989
SWAG4_ECS.1_03	Lowland_East	48.17168256	32.54085667
SWAG4_SW806_09	Lowland_East	49.77145851	28.87544018
SWAG4_SW795_09	Lowland_East	46.11482776	32.31176814
SWAG4_SW805_01	Lowland_East	47.71460371	30.70814842
SWAG4_SW803_03	Lowland_East	48.40022198	29.67725004
SWAG4_SW797_05	Lowland_East	45.54347921	32.4263124
SWAG4_SW797_03	Lowland_East	47.94549746	26.44101929
SWAG4_SW803_06	Lowland_East	45.86254281	30.37120747
SWAG4_SW806_07	Lowland_East	48.94110491	24.41785312
SWAG4_SW796_05	Lowland_East	45.4292095	28.64635165
SWAG4_SW802_02	Lowland_East	42.68673644	31.05178122
SWAG2_10203	Lowland_Upland	42.83467998	54.49752946
SWAG2_22902	Lowland_Upland	46.72537687	53.12704555
SWAG2_22909	Lowland_Upland	43.8073542	53.68769806
SWAG4_SW788_06	Lowland_East	44.17224268	29.33361724
SWAG4_SW803_10	Lowland_East	44.17224268	29.33361724
SWAG2_22901	Lowland_Upland	41.53778102	54.0614664
SWAG2_20308	Lowland_Upland	46.07692739	53.12704555
SWAG2_41007	Lowland_Upland	42.1862305	53.31392972
SWAG2_10604	Lowland_Upland	42.1862305	53.12704555
SWAG2_51307	Lowland_Upland	41.21355628	53.00245611
SWAG2_23110	Lowland_Upland	39.59243258	53.43851917
SWAG2_51002	Lowland_Upland	41.21355628	52.4418036
SWAG2_40409	Lowland_Upland	39.91665732	52.81557194
SWAG2_51503	Lowland_Upland	43.15890472	51.50738275
SWAG2_21603	Lowland_Upland	41.86200576	52.1926247
SWAG2_31804	Lowland_Upland	39.91665732	52.81557194
SWAG2_23105	Lowland_Upland	40.88933154	52.1926247
SWAG2_30803	Lowland_Upland	41.53778102	52.13032998
SWAG2_20306	Lowland_Upland	42.1862305	51.69426692
SWAG2_52810	Lowland_Upland	42.1862305	51.75656164
SWAG2_20710	Lowland_Upland	44.13157894	50.94673024
SWAG4_ECS.1_02	Lowland_East	42.19332521	31.58050361
SWAG2_10607	Lowland_Upland	42.51045524	50.88443552
SWAG2_31809	Lowland_Upland	41.53778102	51.44508803
SWAG2_53105	Lowland_Upland	38.9439831	51.75656164
SWAG2_10605	Lowland_Upland	41.86200576	50.75984607
SWAG2_33105	Lowland_Upland	38.61975836	51.50738275
SWAG2_10303	Lowland_Upland	40.88933154	50.69755135
SWAG2_10110	Lowland_Upland	41.21355628	50.69755135
SWAG2_31807	Lowland_Upland	39.91665732	50.69755135
SWAG2_31303	Lowland_Upland	36.02596044	52.13032998
SWAG2_13201	Lowland_Upland	37.3228594	51.50738275
SWAG2_42410	Lowland_Upland	35.7017357	52.37950887
SWAG2_51004	Lowland_Upland	36.67440992	51.3827933
SWAG2_51008	Lowland_Upland	39.26820784	50.88443552
SWAG2_51009	Lowland_Upland	38.9439831	50.44837246
SWAG2_42402	Lowland_Upland	36.67440992	51.69426692
SWAG2_30802	Lowland_Upland	39.59243258	50.75984607
SWAG2_42104	Lowland_Upland	37.64708414	51.13361441
SWAG2_53106	Lowland_Upland	38.9439831	50.5729619
SWAG2_40408	Lowland_Upland	37.97130888	50.63525663
SWAG2_21901	Lowland_Upland	37.97130888	50.5729619
SWAG2_31910	Lowland_Upland	40.24088206	50.13689884
SWAG2_33102	Lowland_Upland	39.91665732	49.70083578
SWAG2_53104	Lowland_Upland	37.97130888	50.5729619
SWAG4_SW799_02	Lowland_East	46.28416499	25.49008308
SWAG2_31801	Lowland_Upland	36.35018518	50.32378301
SWAG2_42109	Lowland_Upland	36.35018518	51.00902496
SWAG2_51510	Lowland_Upland	39.26820784	49.45165689
SWAG2_31909	Lowland_Upland	36.02596044	50.5729619
SWAG2_22908	Lowland_Upland	36.02596044	50.51066718
SWAG2_31905	Lowland_Upland	37.64708414	49.82542522
SWAG2_33109	Lowland_Upland	37.97130888	49.88771995
SWAG2_41707	Lowland_Upland	41.21355628	48.45494131
SWAG2_31810	Lowland_Upland	36.67440992	50.07460412
SWAG2_31308	Lowland_Upland	42.51045524	48.26805715
SWAG2_53103	Lowland_Upland	37.3228594	50.01230939
SWAG2_21909	Lowland_Upland	34.080612	50.82214079
SWAG2_41003	Lowland_Upland	36.02596044	49.7631305
SWAG2_41702	Lowland_Upland	32.78371304	51.19590913
SWAG2_10608	Lowland_Upland	38.29553362	49.32706744
SWAG2_41103	Lowland_Upland	38.29553362	49.14018327
SWAG2_52806	Lowland_Upland	39.59243258	49.7631305
SWAG2_10209	Lowland_Upland	39.26820784	48.45494131
SWAG2_31904	Lowland_Upland	35.37751096	49.82542522
SWAG2_23109	Lowland_Upland	35.05328622	49.95001467
SWAG2_42401	Lowland_Upland	36.35018518	49.38936216
SWAG2_31907	Lowland_Upland	35.37751096	49.82542522
SWAG2_51007	Lowland_Upland	41.86200576	47.39593102
SWAG2_41706	Lowland_Upland	35.37751096	49.51395161
SWAG2_13203	Lowland_Upland	36.02596044	48.45494131
SWAG2_30306	Lowland_Upland	34.40483674	49.69043606
SWAG2_10310	Lowland_Upland	35.7017357	49.14018327
SWAG2_42406	Lowland_Upland	37.97130888	48.33035187
SWAG2_41106	Lowland_Upland	37.97130888	48.08117298
SWAG2_41107	Lowland_Upland	37.3228594	48.08117298
SWAG2_31901	Lowland_Upland	34.72906148	49.01559382
SWAG2_10107	Lowland_Upland	38.29553362	47.83199408
SWAG2_22910	Lowland_Upland	33.43216252	49.20247799
SWAG2_10808	Lowland_Upland	36.35018518	47.89428881
SWAG2_41008	Lowland_Upland	34.080612	49.45165689
SWAG2_33108	Lowland_Upland	37.97130888	47.52052047
SWAG2_41010	Lowland_Upland	34.080612	48.33035187
SWAG2_53102	Lowland_Upland	34.72906148	47.83199408
SWAG2_42103	Lowland_Upland	35.7017357	47.70740464
SWAG2_41005	Lowland_Upland	35.37751096	47.58281519
SWAG2_53502	Lowland_Upland	33.43216252	47.70740464
SWAG2_20701	Lowland_Upland	35.37751096	47.89428881
SWAG2_42102	Lowland_Upland	34.40483674	47.58281519
SWAG2_40406	Lowland_Upland	32.78371304	47.83199408
SWAG2_42408	Lowland_Upland	32.4594883	47.70740464
SWAG2_13202	Lowland_Upland	32.78371304	47.76969936
SWAG2_42107	Lowland_Upland	32.78371304	47.83199408
SWAG2_30506	Lowland_Upland	34.40483674	46.77298379
SWAG2_42403	Lowland_Upland	33.43216252	47.3336363
SWAG2_21905	Lowland_Upland	33.10793778	47.20904685
SWAG2_30503	Lowland_Upland	32.13526355	46.89757324
SWAG2_51505	Lowland_Upland	32.4594883	46.46151017
SWAG2_41108	Lowland_Upland	33.43216252	46.5238049
SWAG2_52807	Lowland_Upland	35.05328622	46.08774183
SWAG2_41101	Lowland_Upland	31.16258933	46.71068907
SWAG2_31309	Lowland_Upland	31.48681407	46.46151017
SWAG2_10602	Lowland_Upland	32.78371304	45.65167877
SWAG2_30505	Lowland_Upland	30.51413985	46.08774183
SWAG2_30501	Lowland_Upland	32.78371304	45.27791043
SWAG2_53504	Lowland_Upland	30.51413985	46.08774183
SWAG2_41701	Lowland_Upland	30.51413985	45.52708933
SWAG2_51309	Lowland_Upland	31.81103881	44.77955265
SWAG2_21908	Lowland_Upland	33.10793778	44.53037376
SWAG2_30510	Lowland_Upland	27.92034193	44.59266848
SWAG4_SW805_07	Lowland_East	37.32152475	27.93696875
SWAG2_10309	Lowland_Upland	26.94766771	43.40906874
SWAG2_13208	Lowland_Upland	26.62344297	43.78283708
SWAG2_21902	Lowland_Upland	26.29921823	42.84841623
SWAG2_40403	Lowland_Upland	25.32654401	41.85170066
SWAG5_LNS_6_Kanlow_2	Lowland_South	31.33870647	30.19834148
SWAG2_21910	Lowland_Upland	21.43584713	38.92384867
SWAG4_SW781_08	Lowland_East	38.45875715	26.24092208
SWAG5_X9345_11	Lowland_South	30.61196214	30.78142239
SWAG4_SW795_08	Lowland_East	43.82943355	19.5973547
SWAG4_SW797_09	Lowland_East	35.81494833	25.30955881
SWAG4_SW793_03	Lowland_East	41.22896766	16.65567562
SWAG4_SW788_01	Lowland_East	43.52558512	15.02513067
SWAG4_SW796_01	Lowland_East	43.48662442	15.35921688
SWAG4_High.Tide_10	Lowland_East	43.08477531	16.54696154
SWAG4_SW805_09	Lowland_East	30.68841682	27.61545326
SWAG4_SW781_04	Lowland_East	34.91639612	22.46096133
SWAG4_SW797_02	Lowland_East	41.30222242	16.56505646
SWAG4_SW797_01	Lowland_East	34.6066633	21.65917733
SWAG4_SW799_08	Lowland_East	33.13558524	23.37590623
SWAG4_SW803_07	Lowland_East	27.60313463	28.87544018
SWAG4_SW781_05	Lowland_East	41.20750065	14.82164385
SWAG4_SW795_07	Lowland_East	34.96133003	20.84971871
SWAG4_SW805_08	Lowland_East	29.54571971	24.75184663
SWAG4_SW797_06	Lowland_East	38.0016783	15.81739394
SWAG4_SW788_10	Lowland_East	35.71628409	16.6192038
SWAG4_SW797_10	Lowland_East	30.4598774	21.43006294
SWAG4_SW788_07	Lowland_East	30.23133798	21.20097441
SWAG4_SW781_03	Lowland_East	39.84419609	9.199449681
SWAG4_SW793_09	Lowland_East	28.63156203	17.07738086
SWAG4_SW799_07	Lowland_East	21.9608672	21.50891227
SWAG4_SW788_05	Lowland_East	27.60313463	15.58830541
SWAG4_High.Tide_09	Lowland_East	30.84743014	11.89394272
SWAG4_SW781_07	Lowland_East	23.48942505	18.9100891
SWAG5_LNS_5_Timber_4	Lowland_South	21.31806933	19.42821632
SWAG4_SW793_06	Lowland_East	27.48886492	12.49561025
SWAG4_SW799_09	Lowland_East	24.74639186	14.67195129
SWAG4_SW796_08	Lowland_East	24.51729242	15.14813018
SWAG4_SWG32_03	Lowland_South	23.33872389	16.4740109
SWAG5_X9267_11	Lowland_South	17.79018989	18.06037496
SWAG4_SW799_05	Lowland_East	20.79849507	14.98364063
SWAG3_YHSIB_4	Lowland_South	2.345544774	33.6545393
SWAG4_SW798_01	Lowland_East	22.00391881	12.38106599
SWAG5_X9299_7	Lowland_South	15.78185964	16.00865595
SWAG3_YHSIB_3	Lowland_South	1.818937744	27.10790794
SWAG4_SW788_03	Lowland_East	18.57582749	7.799295377
SWAG4_Kanlow_04	Lowland_South	15.83335443	9.17382656
SWAG3_WS11OK_7019	Lowland_South	7.961624146	17.69266026
SWAG3_WS11OK_3501	Lowland_South	3.941957026	21.6947161
SWAG3_BHSIB_6	Lowland_South	3.065201683	23.24643898
SWAG3_WS11IL_1122	Lowland_South	5.574033486	21.38308493
SWAG3_WS11IL_1127	Lowland_South	1.292360284	19.94767455
SWAG3_WS11IL_1123	Lowland_South	4.453194953	17.66226345
SWAG4_SW789_01	Lowland_South	15.71908472	4.935688747
SWAG3_WS11OK_6409	Lowland_South	4.124697697	18.05592031
SWAG4_Kanlow_07	Lowland_South	15.37627559	4.706600216
SWAG3_BHSIB_7	Lowland_South	1.714393194	24.62569374
SWAG4_SW788_02	Lowland_East	14.1900953	3.686679777
SWAG3_YHSIB_7	Lowland_South	1.855970407	19.60217465
SWAG3_WS11IL_1126	Lowland_South	2.933659735	17.4262569
SWAG3_WS11OK_7005	Lowland_South	0.777572481	18.99021574
SWAG4_SWG39_09	Lowland_South	11.8008278	7.302425269
SWAG3_WS11OK_7020	Lowland_South	2.563488374	20.93176888
SWAG3_BHSIB_4	Lowland_South	1.520489523	20.45522046
SWAG3_YHSIB_1	Lowland_South	1.575040314	17.85701453
SWAG4_Kanlow_01	Lowland_South	13.69634631	2.517358784
SWAG3_BHSIB_1	Lowland_South	2.117174152	18.48322245
SWAG3_YHSIB_5	Lowland_South	0.789540156	18.99077511
SWAG4_SWG39_01	Lowland_South	11.60155285	4.830920602
SWAG4_SWG39_08	Lowland_South	12.97661166	2.644803442
SWAG4_SWG32_05	Lowland_South	11.49110542	3.675701829
SWAG3_BHSIB_3	Lowland_South	0.487064267	16.25836753
SWAG4_SWG32_04	Lowland_South	10.57694774	4.477511686
SWAG4_SWG32_08	Lowland_South	10.80548716	4.248423155
SWAG4_Kanlow_02	Lowland_South	11.94818426	2.644803442
SWAG3_BHSIB_5	Lowland_South	1.251849567	15.37865651
SWAG4_SWG32_02	Lowland_South	9.891329472	4.019334625
SWAG3_YHSIB_2	Lowland_South	1.146832225	14.5234871
SWAG3_BHSIB_2	Lowland_South	2.001457367	17.94262905
SWAG4_Kanlow_10	Lowland_South	9.434250629	4.13387889
SWAG4_Timber_04	Lowland_South	10.2341386	3.332069033
SWAG3_YHSIB_9	Lowland_South	4.694066112	16.96549468
SWAG4_SW790_07	Lowland_South	9.434250629	2.759347707
SWAG4_Timber_05	Lowland_South	8.841842323	3.065838664
SWAG4_SWG39_07	Lowland_South	7.83447468	3.675701829
SWAG4_Kanlow_09	Lowland_South	6.577507862	4.821144481
SWAG4_SWG39_05	Lowland_South	4.406383359	6.76839699
SWAG4_Kanlow_08	Lowland_South	9.031945039	2.985989135
SWAG3_WS11OK_7027	Lowland_South	1.652250465	12.37344031
SWAG4_Timber_06	Lowland_South	7.148856415	3.332069033
SWAG4_SWG39_06	Lowland_South	7.021910452	2.867947052
SWAG4_SWG39_02	Lowland_South	5.891889598	3.217524768
SWAG4_Timber_01	Lowland_South	8.813280839	2.954315026
SWAG4_SWG32_10	Lowland_South	6.691777573	2.301170646
SWAG4_SWG32_01	Lowland_South	6.790818059	2.44920493
SWAG5_LNS_10_Timber_3	Lowland_South	9.494765372	3.656082375
SWAG5_LNS_2_Timber_5	Lowland_South	10.16733456	1.223257432
SWAG5_LNS_4_Timber_1	Lowland_South	8.258907419	3.291193018
SWAG4_SW790_03	Lowland_South	4.699268737	2.900058334
SWAG6_049	Lowland_South	4.616380548	3.152045321
SWAG5_X9366_5	Lowland_South	7.306852897	4.32706441
SWAG5_X9267_10	Lowland_South	9.010664255	0.939303394
SWAG5_X08_9064_12	Lowland_South	7.59460853	2.57224248
SWAG5_X9366_11	Lowland_South	7.641173861	1.746899826
SWAG5_LNS_12_Kanlow_3	Lowland_South	6.377028881	2.093012583
SWAG5_X9345_8	Lowland_South	6.193230306	0.796636252
SWAG5_LNS_7_Timber_2	Lowland_South	4.480811412	2.785238096
SWAG5_X9267_7	Lowland_South	4.607617257	2.749595934
SWAG5_X9394_4	Lowland_South	3.743393508	2.554496258
SWAG5_X9231_1	Lowland_South	4.731180828	1.138651931
SWAG5_X08_9005_12	Lowland_South	4.79748894	1.190235786
SWAG5_X9263_1	Lowland_South	4.067787334	1.430131965
SWAG5_X9171_7	Lowland_South	3.493729864	2.186819817
SWAG5_X9173_1	Lowland_South	4.544834919	0.917246217
SWAG5_X08_9035_7	Lowland_South	4.452562926	1.364243144
SWAG5_X9394_2	Lowland_South	3.757611979	1.375906736
SWAG5_X9299_11	Lowland_South	4.036372022	0.886275722
SWAG5_X9366_9	Lowland_South	2.190227735	3.422530493
SWAG5_X9231_9	Lowland_South	3.678890922	1.198148064
SWAG5_X08_9061_12	Lowland_South	4.142284112	0.720295415
SWAG5_X08_9005_3	Lowland_South	4.110861435	0.723820334
SWAG5_X9317_4	Lowland_South	3.456471388	1.536108203
SWAG5_X9317_8	Lowland_South	4.185825275	0.486097939
SWAG5_LNS_3_Alamo_4	Lowland_South	3.20403303	1.516795204
SWAG5_LNS_8_Alamo_5	Lowland_South	3.005975603	1.631528907
SWAG5_X9299_1	Lowland_South	3.743393508	0.823932475
SWAG5_X08_9046_10	Lowland_South	3.638048093	0.708561556
SWAG5_X9231-5	Lowland_South	4.13278963	1.48566377
SWAG5_X08_9010_1	Lowland_South	3.367937731	0.847609363
SWAG5_X9173_12	Lowland_South	1.6280993	3.183146219
SWAG5_X08_9046_6	Lowland_South	1.741830624	1.746899826
SWAG5_X08_9061_5	Lowland_South	3.692953199	1.032269166
SWAG5_X9173_6	Lowland_South	2.735060975	0.855666657
SWAG5_X08_9064_8	Lowland_South	2.870962754	0.315027443
SWAG5_X9267_1	Lowland_South	2.543420986	0.400059885
SWAG5_X9263_5	Lowland_South	3.079148159	0.761103186
SWAG6_050	Lowland_South	1.453662525	0.48214242
SWAG5_X9263-10	Lowland_South	3.168407581	0.422309641
SWAG5_X9154_12	Lowland_South	2.314772592	0.492819592
SWAG5_X08_9046_12	Lowland_South	1.741830624	0.939303394
SWAG5_X9366_3	Lowland_South	2.046714025	0.706279284
SWAG5_X9299_12	Lowland_South	1.800343549	0.492380601
SWAG5_X9171-11	Lowland_South	1.811857413	0.711701609
SWAG5_X9171_3	Lowland_South	2.506505929	0.761103186
SWAG5_X9171-9	Lowland_South	2.04735705	0.320449768
SWAG5_X08_9005_1	Lowland_South	1.531139794	0.593190637
SWAG5_X9408_12	Lowland_South	1.292306185	0.49616033
SWAG5_X9370_12	Lowland_South	1.520365429	0.332568493
SWAG5_X9345_4	Lowland_South	1.945392856	0.302420938
SWAG6_010	Lowland_South	0.587581557	0.527861715
SWAG5_X9394_12	Lowland_South	1.573413629	0.451094887
SWAG5_LNS_1_Alamo_3	Lowland_South	1.676910856	0.298286942
SWAG5_X9171-5	Lowland_South	1.004412719	0.247077881
SWAG6_048	Lowland_South	0.560243951	0.033706403
SWAG6_002	Lowland_South	0.438441062	0.034537489
SWAG6_041	Lowland_South	0.374985994	0.032971657
SWAG6_012	Lowland_South	0.353839273	0.034537489
SWAG6_053	Lowland_South	0.324078887	0.042020916
SWAG6_058	Lowland_South	0.32623607	0.033678111
SWAG6_057	Lowland_South	0.32623607	0.029758078
SWAG6_046	Lowland_South	0.247448629	0.055424527
SWAG6_009	Lowland_South	0.245361241	0.098439548
SWAG6_035	Lowland_South	0.245361241	0.098439548
SWAG6_040	Lowland_South	0.294123944	0.035536821
SWAG6_017	Lowland_South	0.245361241	0.098451295
SWAG6_018	Lowland_South	0.245361241	0.098451295
SWAG6_026	Lowland_South	0.201703195	0.040256752
SWAG6_051	Lowland_South	0.248233443	0.029758078
SWAG6_013	Lowland_South	0.222246734	0.042923292
SWAG6_007	Lowland_South	0.201703195	0.038992488
SWAG6_042	Lowland_South	0.151220043	0.059521018
SWAG6_030	Lowland_South	0.170230817	0.033702378
SWAG6_044	Lowland_South	0.170230817	0.033702378
SWAG6_027	Lowland_South	0.184635696	0.034537489
SWAG6_038	Lowland_South	0.184635696	0.034537489
SWAG6_047	Lowland_South	0.170230817	0.033706403
SWAG6_015	Lowland_South	0.201703195	0.035536821
SWAG6_055	Lowland_South	0.170230817	0.030814584
SWAG6_008	Lowland_South	0.245361241	0.090012374
SWAG6_004	Lowland_South	0.109282446	0.040256752
SWAG6_031	Lowland_South	0.109282446	0.040256752
SWAG6_037	Lowland_South	0.109282446	0.040256752
SWAG6_032	Lowland_South	0.085552092	0.03136705
SWAG6_059	Lowland_South	0.09222819	0.033678111
SWAG6_014	Lowland_South	0.151220043	0.049663315
SWAG6_011	Lowland_South	0.09222819	0.033706403
SWAG6_036	Lowland_South	0.09222819	0.033706403
SWAG6_060	Lowland_South	0.09222819	0.03194166
SWAG6_028	Lowland_South	0.134070987	0.044174771
SWAG6_043	Lowland_South	0.109282446	0.038992488
SWAG6_033	Lowland_South	0.100033907	0.034537489
SWAG6_045	Lowland_South	0.100033907	0.034537489
SWAG6_054	Lowland_South	0.09222819	0.030814584
SWAG6_056	Lowland_South	0.09222819	0.030814584
SWAG6_020	Lowland_South	0.20319735	0.074773751
SWAG6_039	Lowland_South	0.120414581	0.036571266
SWAG6_001	Lowland_South	0.109282446	0.035532004
SWAG6_023	Lowland_South	0.109282446	0.035532004
SWAG6_052	Lowland_South	0.09222819	0.029758078
SWAG6_034	Lowland_South	0.134070987	0.042607035
SWAG6_005	Lowland_South	0.245361241	0.08692927
SWAG6_019	Lowland_South	0.245361241	0.08692927
SWAG6_021	Lowland_South	0.245361241	0.08692927
SWAG6_024	Lowland_South	0.245361241	0.08692927
